# Supplementary material
Source: PubMed Central journal article supplement (PMC6554031)
Supplement: NIHMS1017191-supplement-Supporting_Information.pdf [file NIHMS1017191-supplement-Supporting_Information.pdf]

|                        |                                                                                                                                                                                                                                                                                                                                              |
|------------------------|----------------------------------------------------------------------------------------------------------------------------------------------------------------------------------------------------------------------------------------------------------------------------------------------------------------------------------------------|
| 1/2012                 | <p>72yF presented at the MSKCC with new dx SCC left lateral tongue clinically T4aN1M0 (AJCC staging).</p> <p><b>Social history: never smoker; no alcohol history, Cantonese-speaking</b></p> <p><b>Med History: HTN, peptic ulcer disease</b></p>                                                                                            |
| 1/18/2012<br>-4/2/2012 | <p>Due to rapid tumor growth was referred for induction chemo carboplatin (AUC 2) + paclitaxel (90 mg/m<sup>2</sup>) given together on a 3 weeks on/1 week off cycle, for 3 cycles.</p> <p>She experienced initial transient response followed by rebound progression</p>                                                                    |
| 4/27/2012              | <p>Total glossectomy, mandibulotomy, bilateral neck dissections.</p> <p>Pathology: squamous cell carcinoma, moderately differentiated, T4aN2bM0</p> <p>4.5-cm tumor invading skeletal muscle, 2 left neck nodes positive with extranodal extension identified. <b>This is the sample referred to as Cetux<sup>Sen</sup></b></p>              |
| 6/19/2012<br>-8/9/2012 | <p>Radiation therapy (maximum total dose 6804 cGy) concurrent with weekly cisplatin (30 mg/m<sup>2</sup> weekly × 6 weeks)</p>                                                                                                                                                                                                               |
| 8/23/2012<br>imaging   | <p>Recurrent primary tumor and b/l lung mets</p>                                                                                                                                                                                                                                                                                             |
| 8/27/2012              | <p>Began cetuximab 500 mg/m<sup>2</sup> q2W, and continues on treatment 10+ months with near complete response (9/30/2013 CT scans were “best response”)</p>                                                                                                                                                                                 |
| 1/7/2014<br>imaging    | <p>Lesion in right upper lobe of lung (2.1 cm) is clearly increased compared with prior CT chest of September 2013, when it was subcentimeter in size. This was an isolated progressing lesion.</p>                                                                                                                                          |
| 2/5/2014               | <p>Right lung core biopsy: + SCC</p>                                                                                                                                                                                                                                                                                                         |
| 2/25/2014              | <p>Right upper lung lobectomy. + SCC. Tumor size 4.2 × 2.9 × 1.7 cm. <b>This is the sample referred to as Cetux<sup>Res</sup>.</b></p> <p>Due to surgery, there was brief interruption in cetuximab dosing. After the 2/10/2014 dose, the next cetuximab dose was on 3/10/2014, at which time cetuximab 500 mg/m<sup>2</sup> q2W resumed</p> |
| 5/27/2014<br>imaging   | <p>Isolated progression of a single lesion, with new hypermetabolic nodule in upper pole of right kidney</p>                                                                                                                                                                                                                                 |
| 6/18/2014              | <p>Biopsy of right kidney mass: + SCC. There was insufficient material on this sample to support correlative tests</p>                                                                                                                                                                                                                       |
| 7/28/2014              | <p>Compared with PET/CT of 5/27/2014, multiple new bilateral pulmonary mets and increase in mass of right kidney mass</p>                                                                                                                                                                                                                    |
| 8/4/2014               | <p>Begins clinical trial of cetuximab 500 mg/m<sup>2</sup> weekly + HER3 inhibitor (LJM716), but experiences rapid disease progression. Last dose on study was 9/2/2014</p> <p>Patient received additional palliative chemotherapy off protocol, but experienced further progression of disease</p>                                          |
| 10/8/2014              | <p>Died</p>                                                                                                                                                                                                                                                                                                                                  |

**Figure S1**

A

|    | Gene       | Base Mean      | Log2 Fold Change | p-adj            |
|----|------------|----------------|------------------|------------------|
| 1  | SFTPB      | 26760.90       | 11.28            | >E-295           |
| 2  | SFTPA2     | 20034.24       | 11.26            | >E-295           |
| 3  | KRT16      | 32990.98       | -3.48            | >E-295           |
| 4  | <b>MET</b> | <b>7907.71</b> | <b>3.21</b>      | <b>4.71E-294</b> |
| 5  | LTF        | 4624.83        | 8.42             | 1.10E-279        |
| 6  | SLC34A2    | 7936.38        | 9.91             | 4.52E-257        |
| 7  | ABCA3      | 2014.43        | 6.35             | 7.13E-243        |
| 8  | ROS1       | 2382.55        | 7.11             | 1.15E-235        |
| 9  | SFTPA1     | 14317.45       | 11.41            | 1.88E-232        |
| 10 | CA12       | 4068.92        | -2.99            | 3.86E-229        |
| 11 | SBSN       | 2839.90        | -2.89            | 1.7E-192         |
| 12 | EGFR       | 14898.22       | -2.37            | 1.4E-191         |
| 13 | S100A2     | 21689.51       | -2.39            | 6E-187           |
| 14 | CAV1       | 6879.32        | 2.49             | 7.4E-187         |
| 15 | CLU        | 2014.20        | 3.29             | 3.2E-184         |
| 16 | COMP       | 1446.65        | -3.43            | 2E-177           |
| 17 | NAPSA      | 2196.67        | 7.95             | 3E-170           |
| 18 | KRT6A      | 58497.21       | -2.30            | 1.2E-166         |
| 19 | MUC1       | 1436.96        | 3.43             | 3.3E-164         |
| 20 | KRT6B      | 8580.45        | -2.78            | 1.6E-157         |
| 21 | DMBT1      | 3860.40        | 9.61             | 5.6E-155         |
| 22 | SUMF2      | 4567.64        | -2.42            | 1.3E-152         |
| 23 | CALML3     | 8081.78        | -2.66            | 1.3E-145         |
| 24 | FAM46C     | 2174.29        | 2.69             | 8E-141           |
| 25 | KRT14      | 80923.04       | -2.04            | 1.4E-139         |

B

| Name           | Size      | Enrichment Score | Normalized Enrichment Score | Normalized p-val | FDR q-val       | FWER p-val   |
|----------------|-----------|------------------|-----------------------------|------------------|-----------------|--------------|
| CHR14Q32       | 129       | 0.89197          | 2.200935                    | >0.001           | >0.001          | >0.001       |
| CHR2P11        | 53        | 0.885296         | 1.947813                    | >0.001           | >0.001          | >0.001       |
| CHR22Q11       | 108       | 0.78945          | 1.908233                    | >0.001           | 4.47E-04        | 0.001        |
| <b>CHR7Q31</b> | <b>50</b> | <b>0.877718</b>  | <b>1.895376</b>             | <b>&gt;0.001</b> | <b>3.35E-04</b> | <b>0.001</b> |
| CHR5P13        | 35        | 0.819092         | 1.658656                    | 0.011905         | 0.16508         | 0.487        |
| CHR2Q24        | 24        | 0.812358         | 1.641653                    | 0.015748         | 0.175098        | 0.575        |
| CHR18Q11       | 24        | 0.817887         | 1.578883                    | 0.02681          | 0.325985        | 0.848        |

Figure S2

A

MET - Entrez ID: 4233

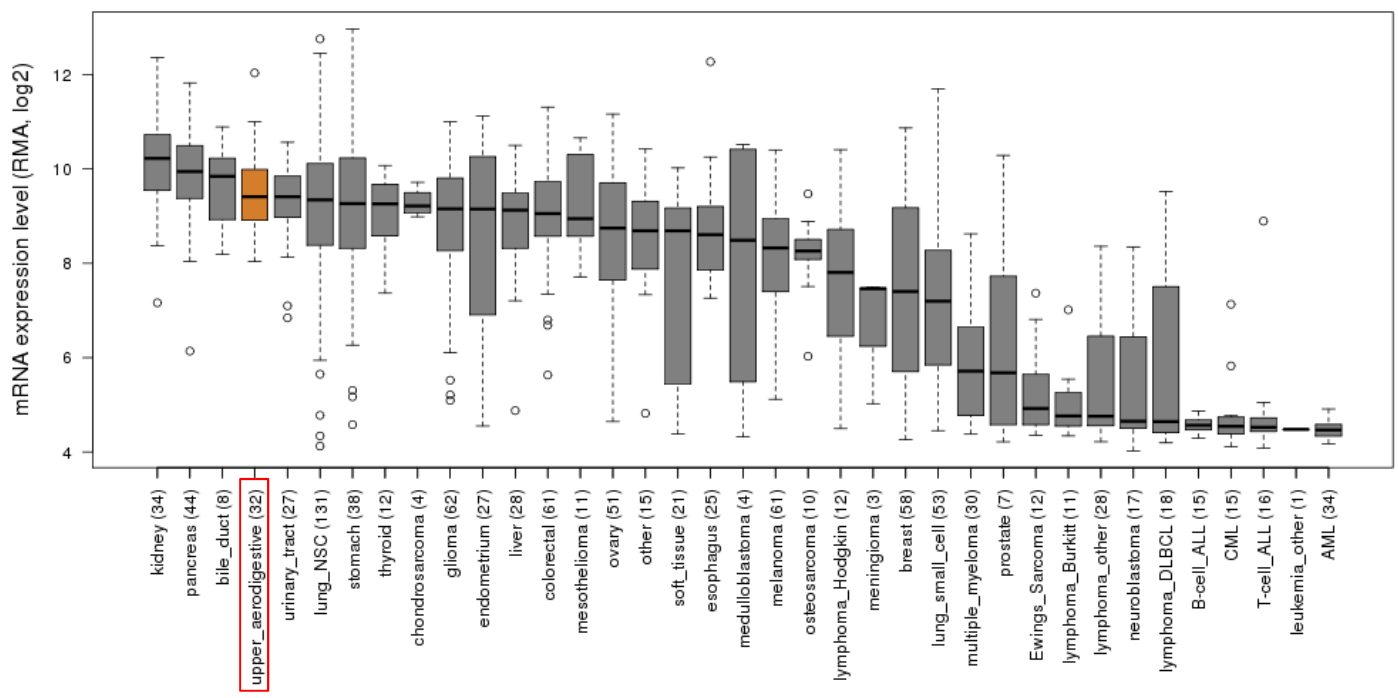

| Cell Line | mRNA expression level (RMA, Log2) |
|-----------|-----------------------------------|
| SNU1076   | 9.8722                            |
| HSC4      | 8.1258                            |
| CAL33     | 9.9910                            |
| HSC2      | 8.6362                            |
| FADU      | 8.7896                            |

B

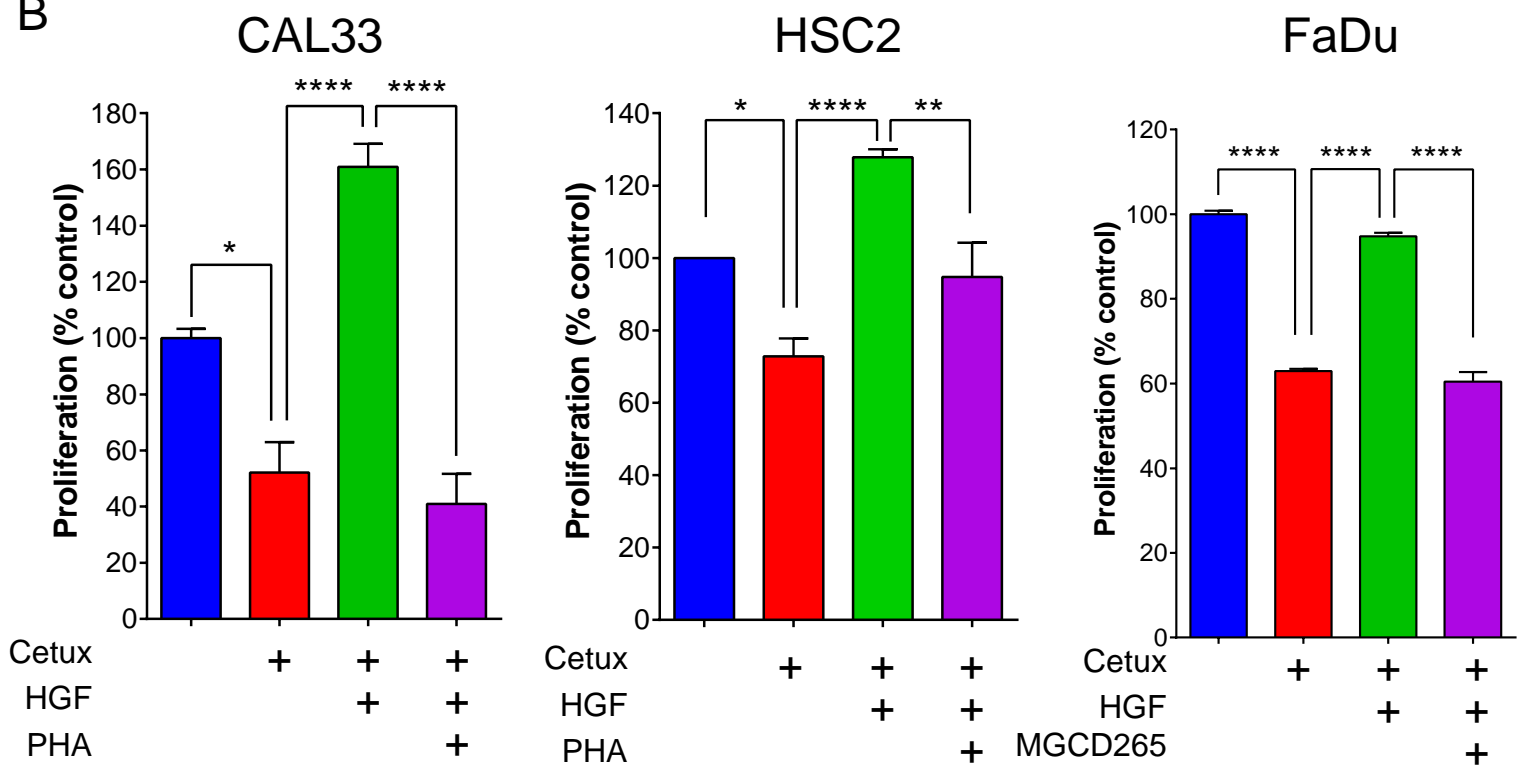

Figure S3

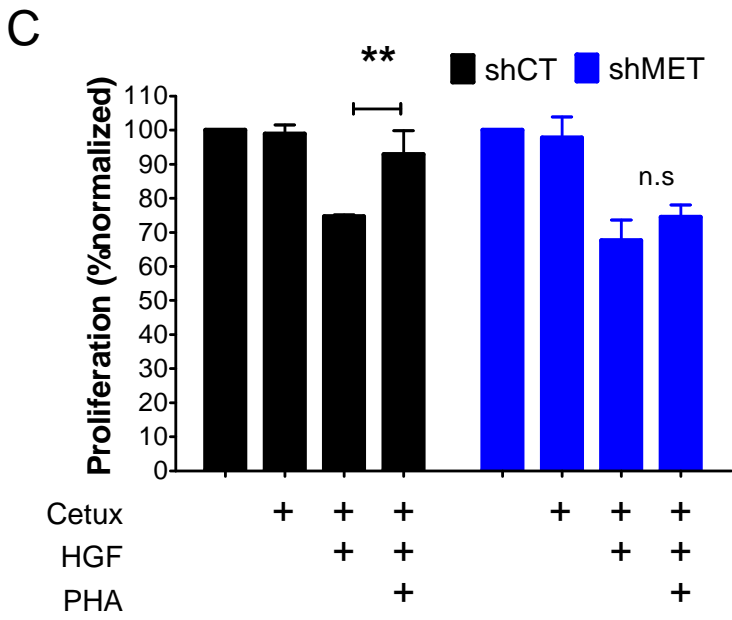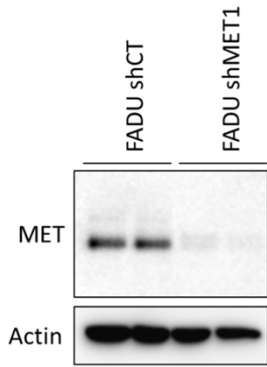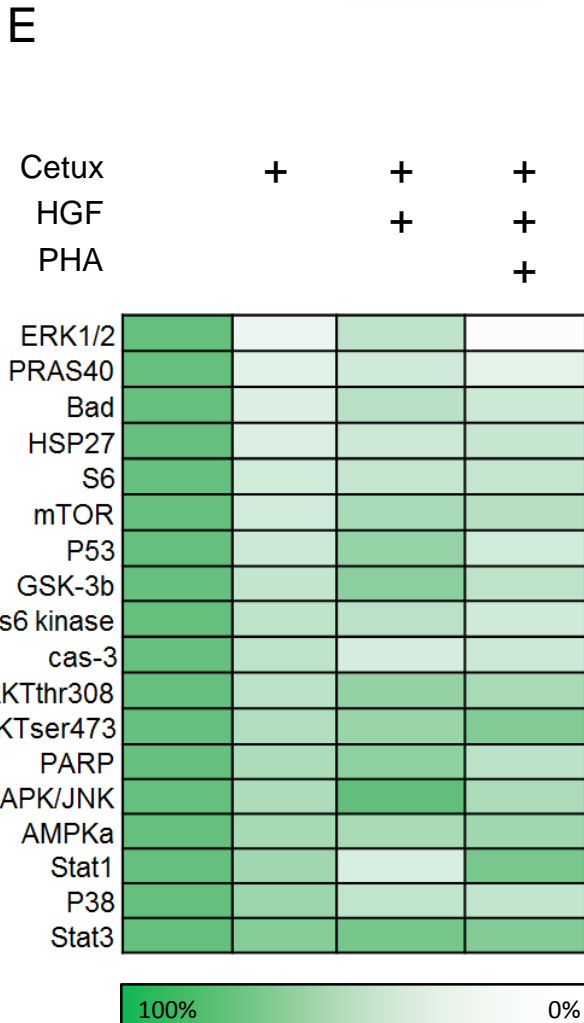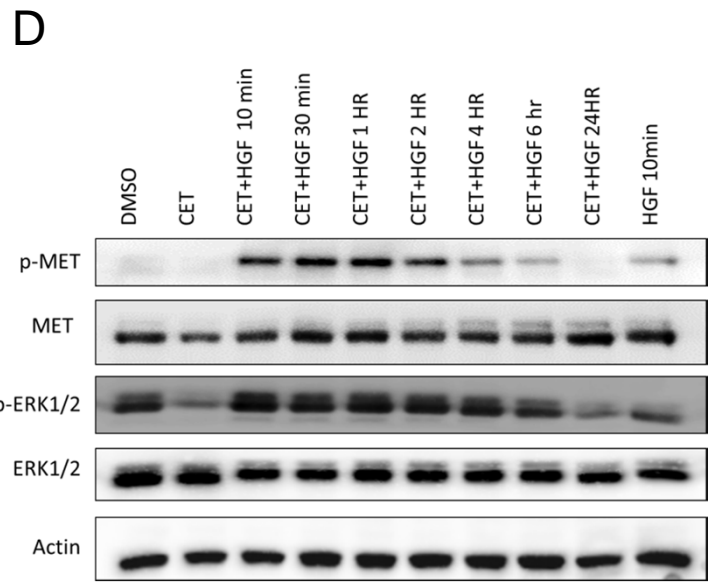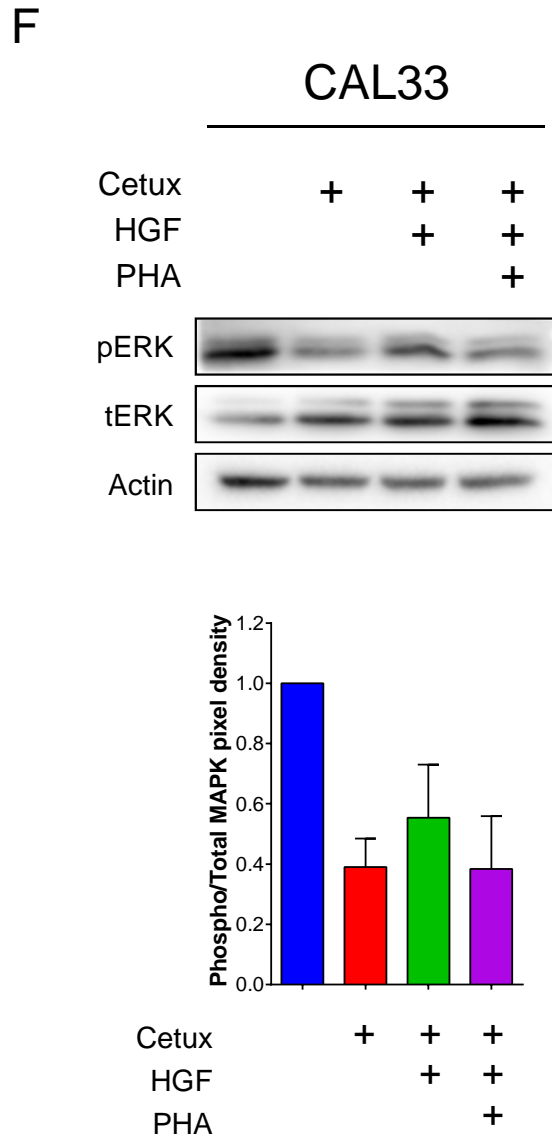

**Figure S3**

G

SNU1076

HSC4

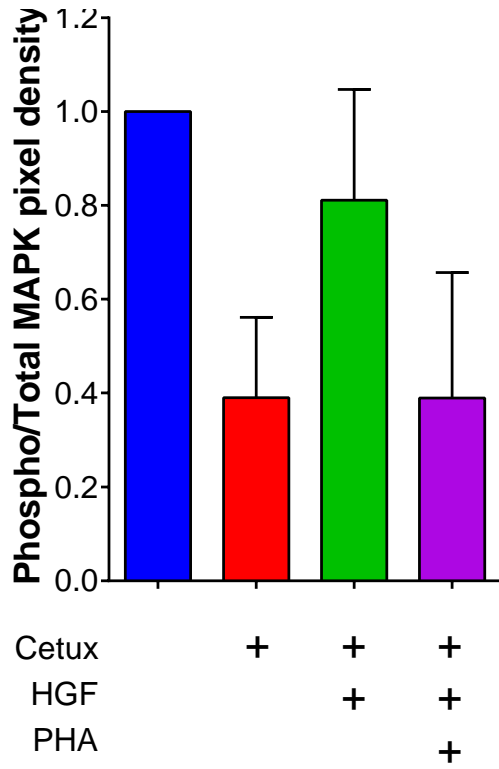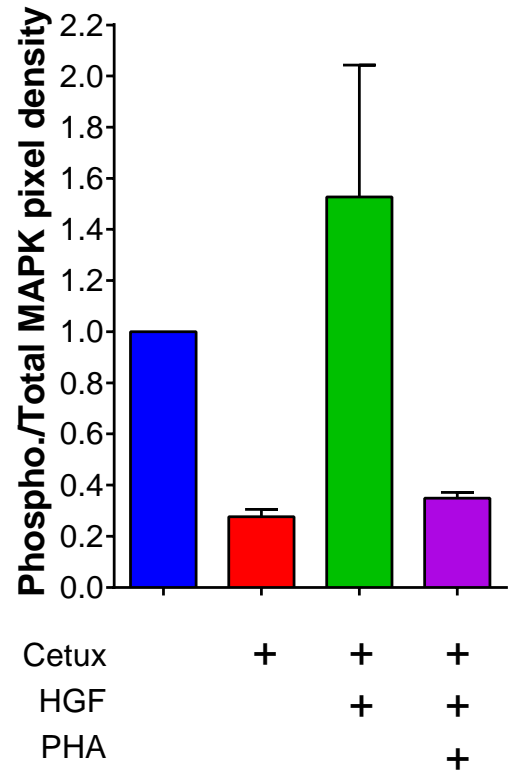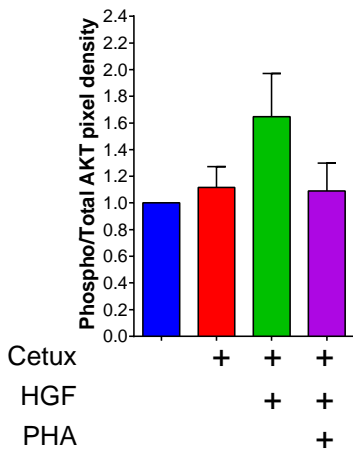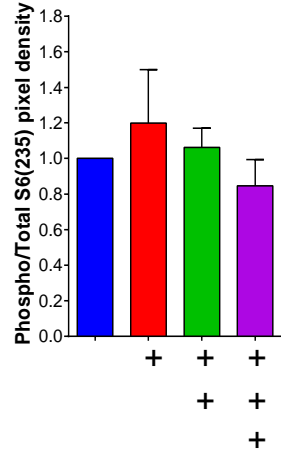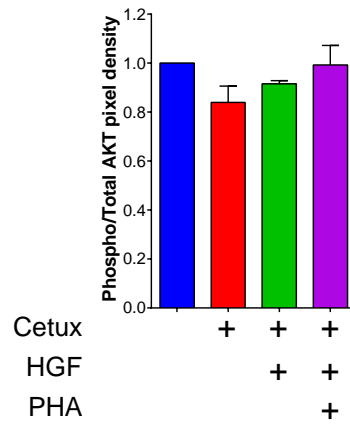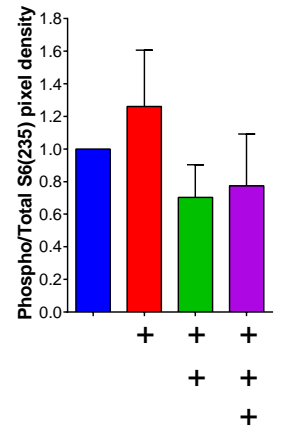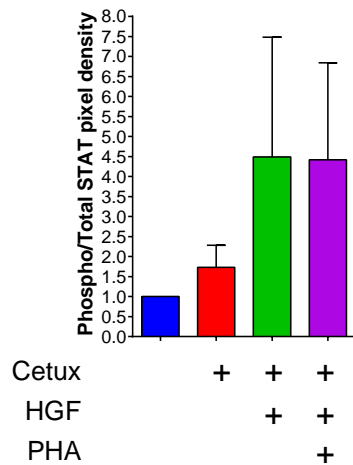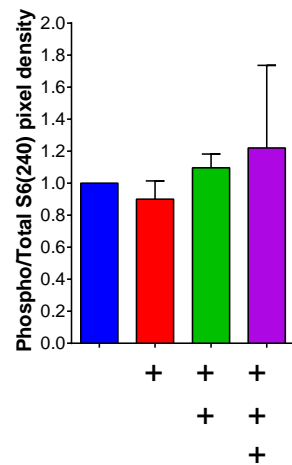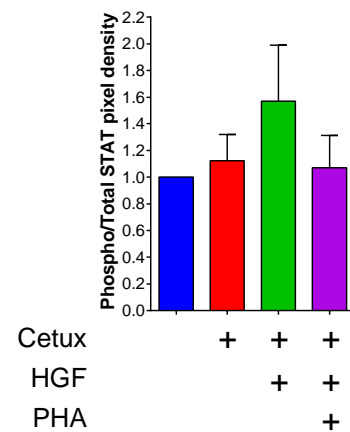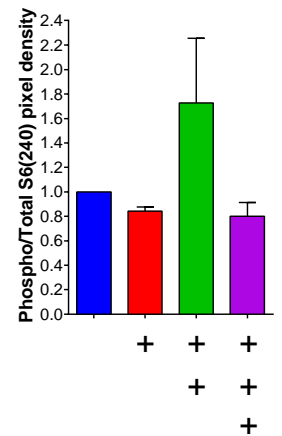

Figure S3

A

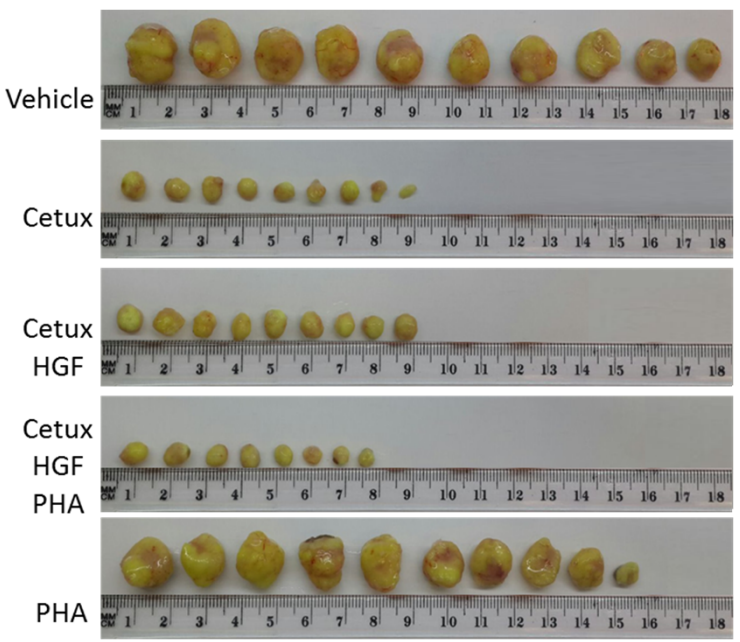

B

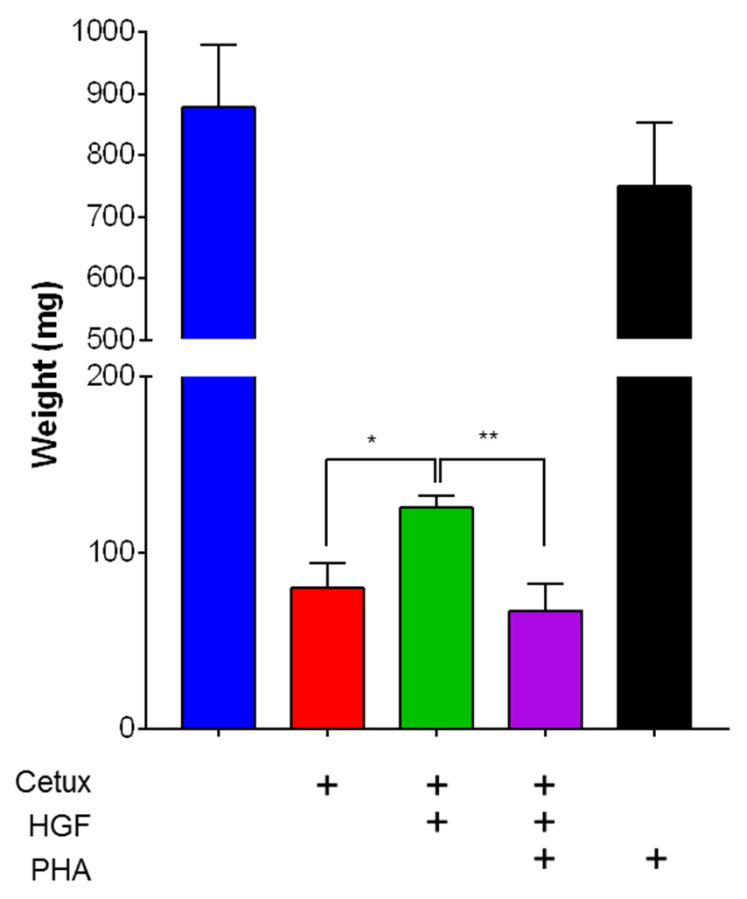

Figure S4

A

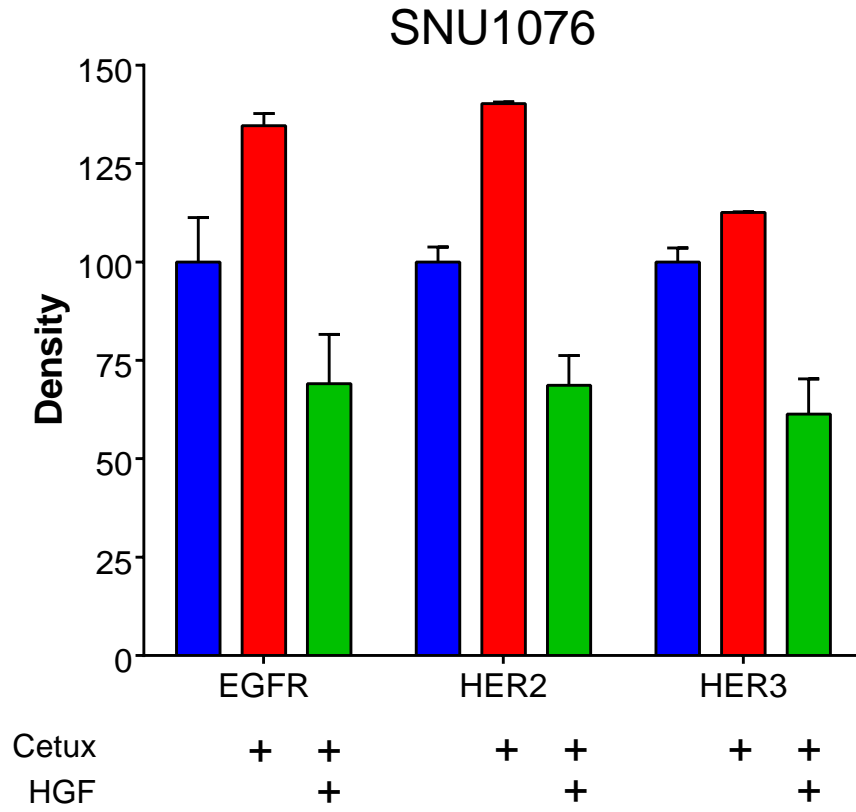

B

MET/ ERBB3

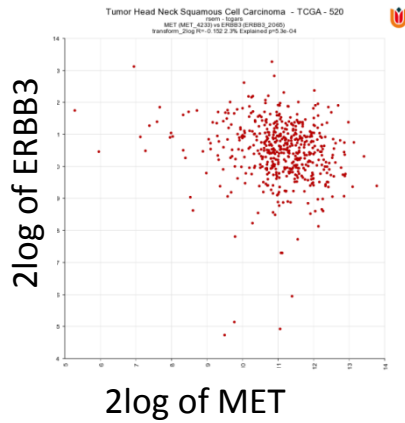

**Significance of correlation:  
 R-value=-0.152 p-value=5.3e-04**

MET/ ERBB2

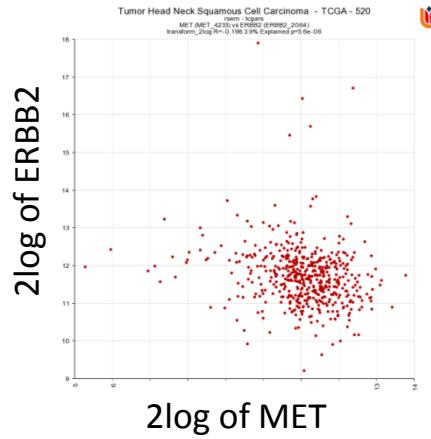

**Significance of correlation:  
 R-value=-0.198 p-value=5.6e-06**

**Figure S5**

C

SNU1076

HSC4

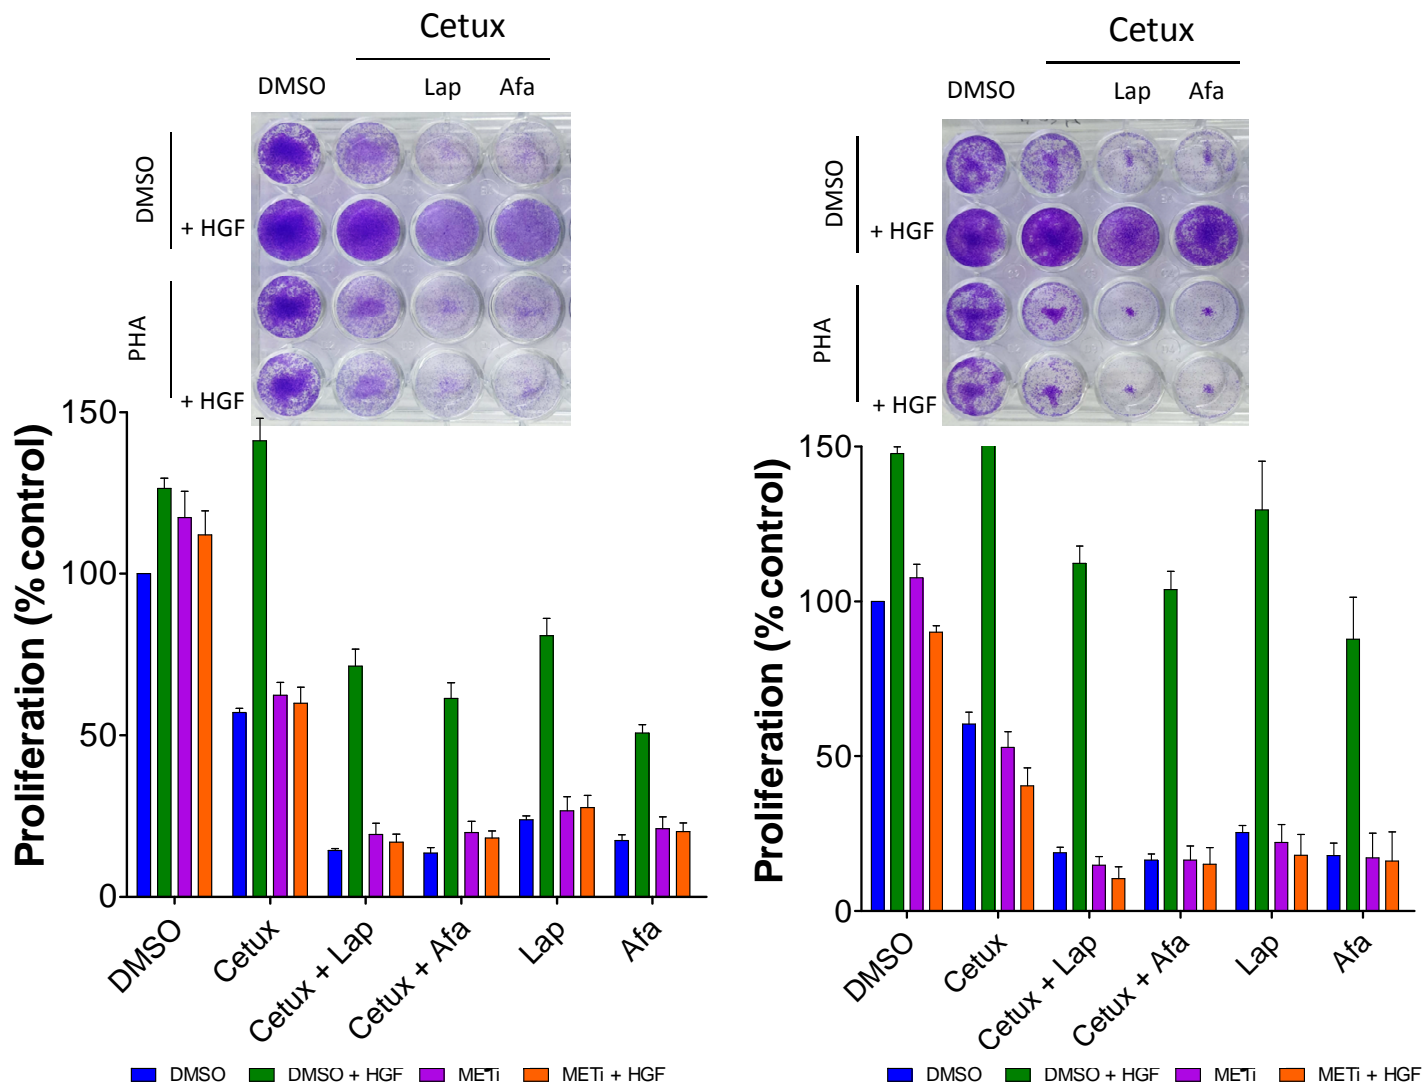

D

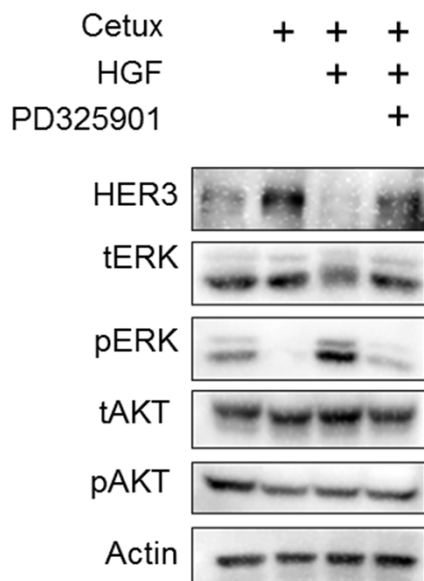

E

CAS 1041438-68-9

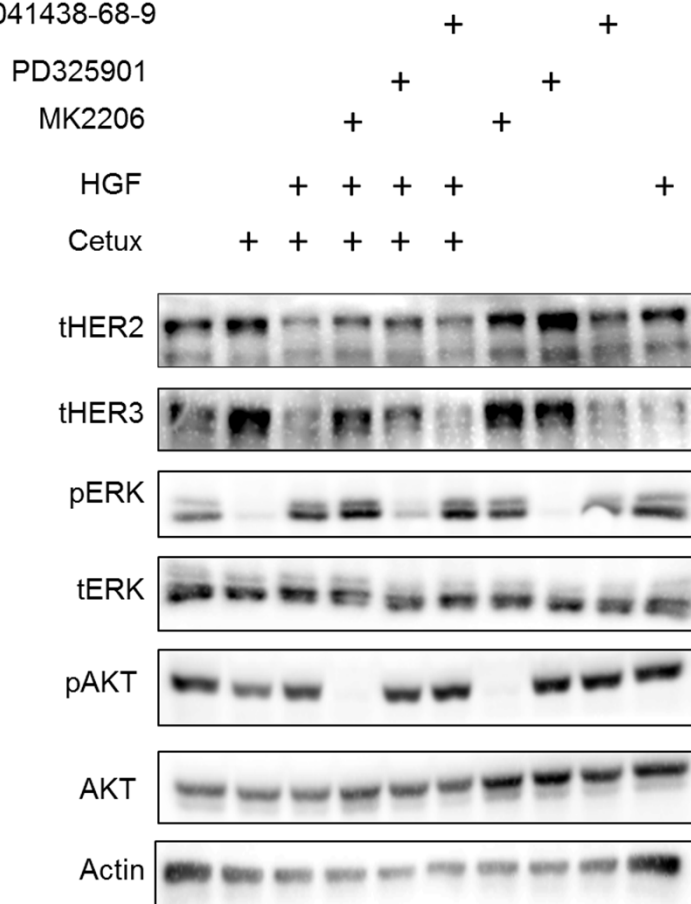

Figure S5



A

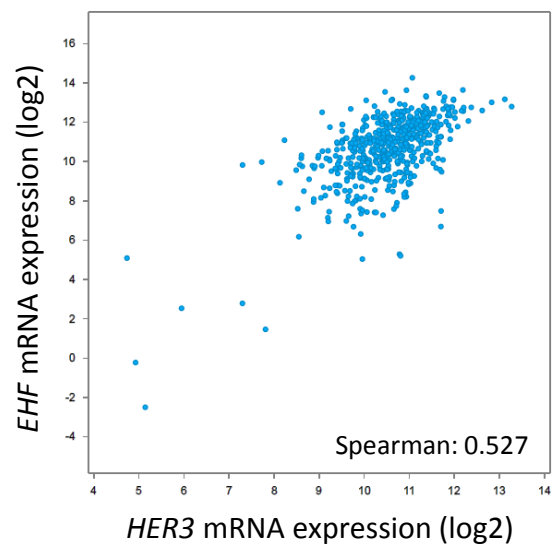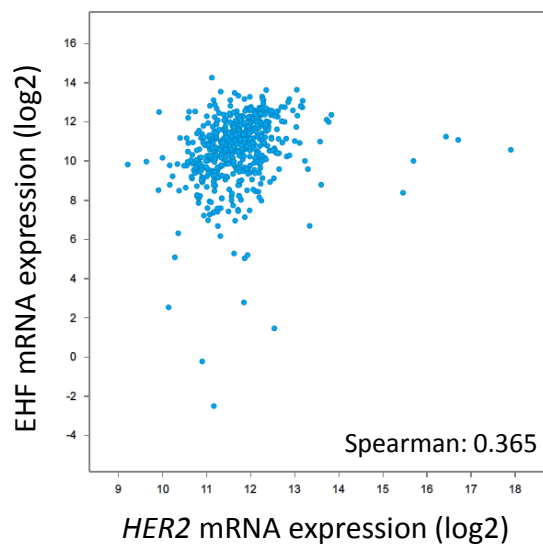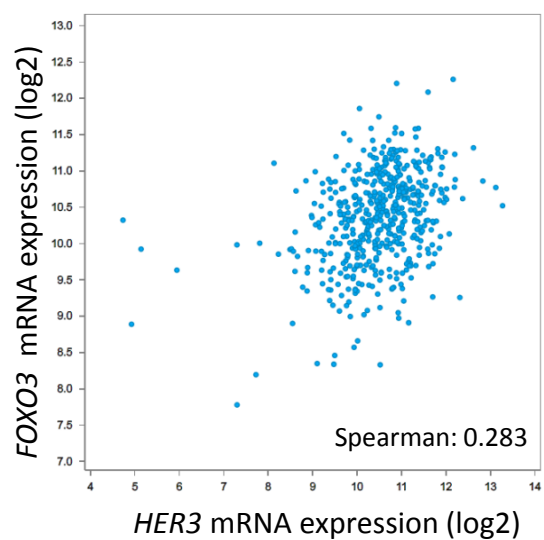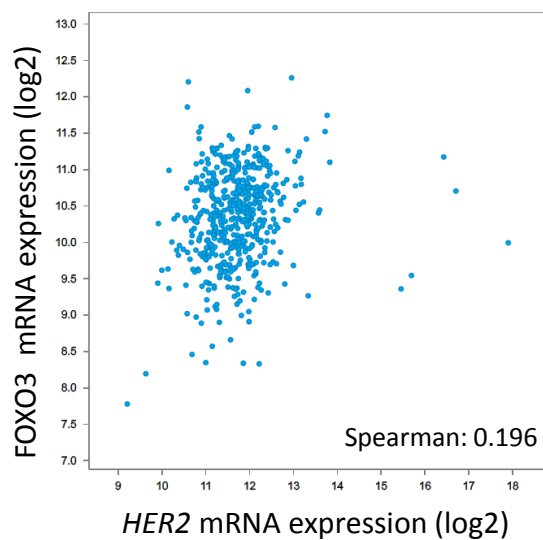

Figure S6

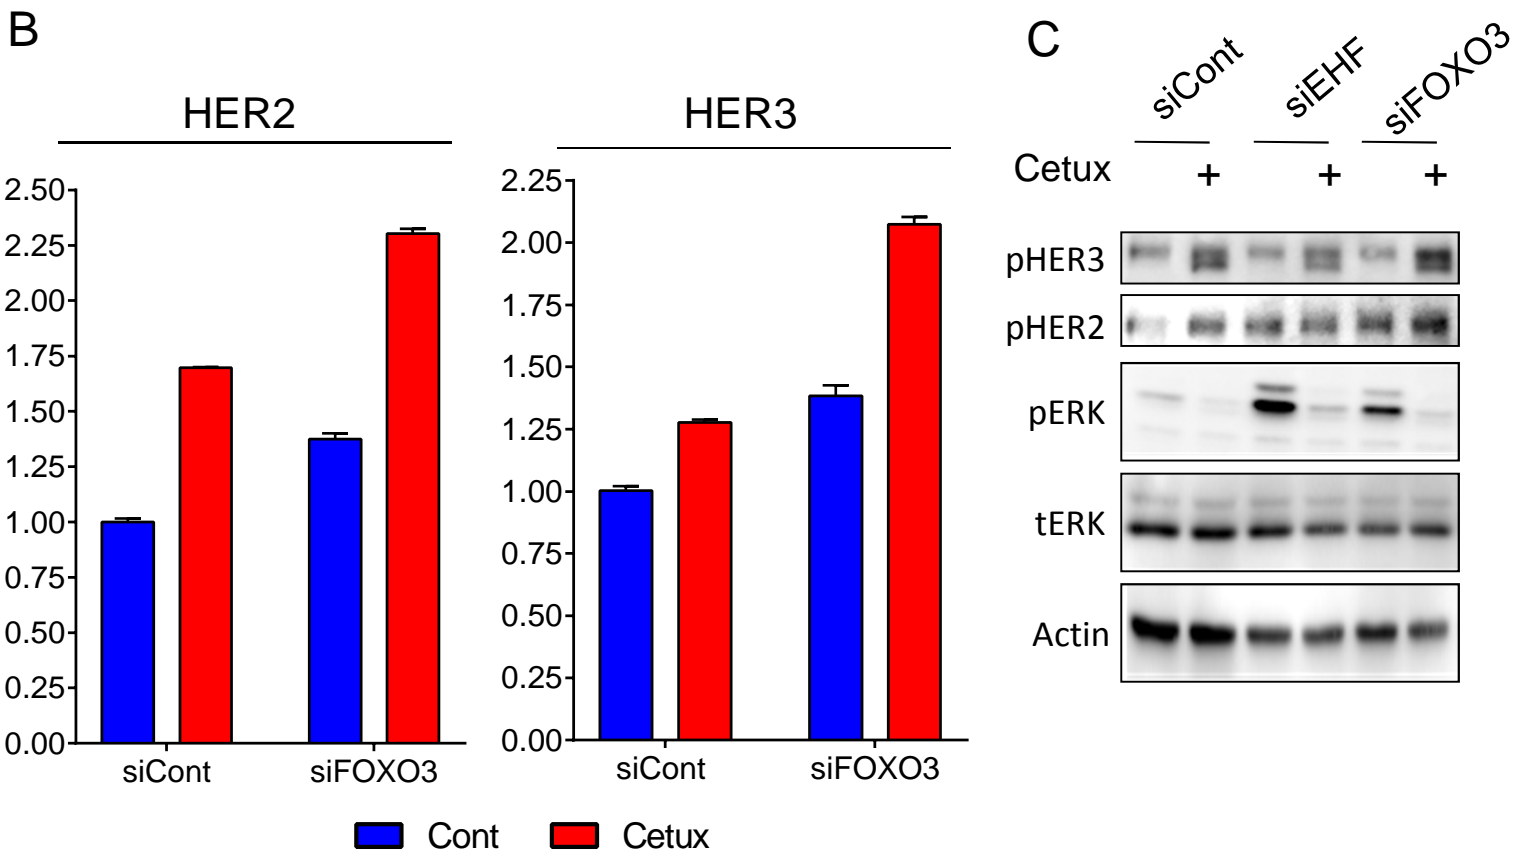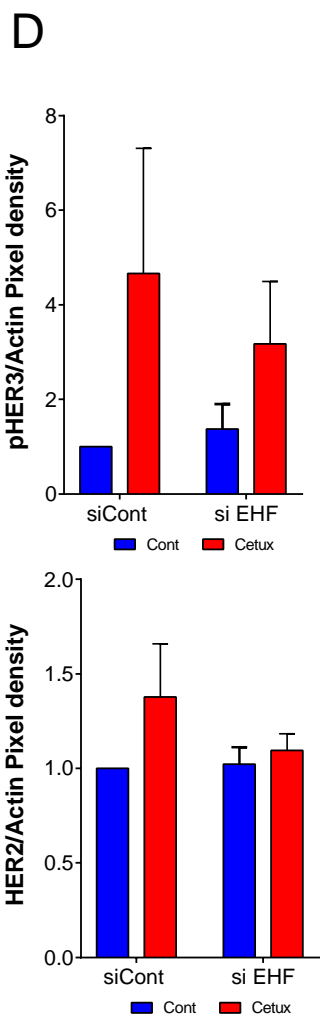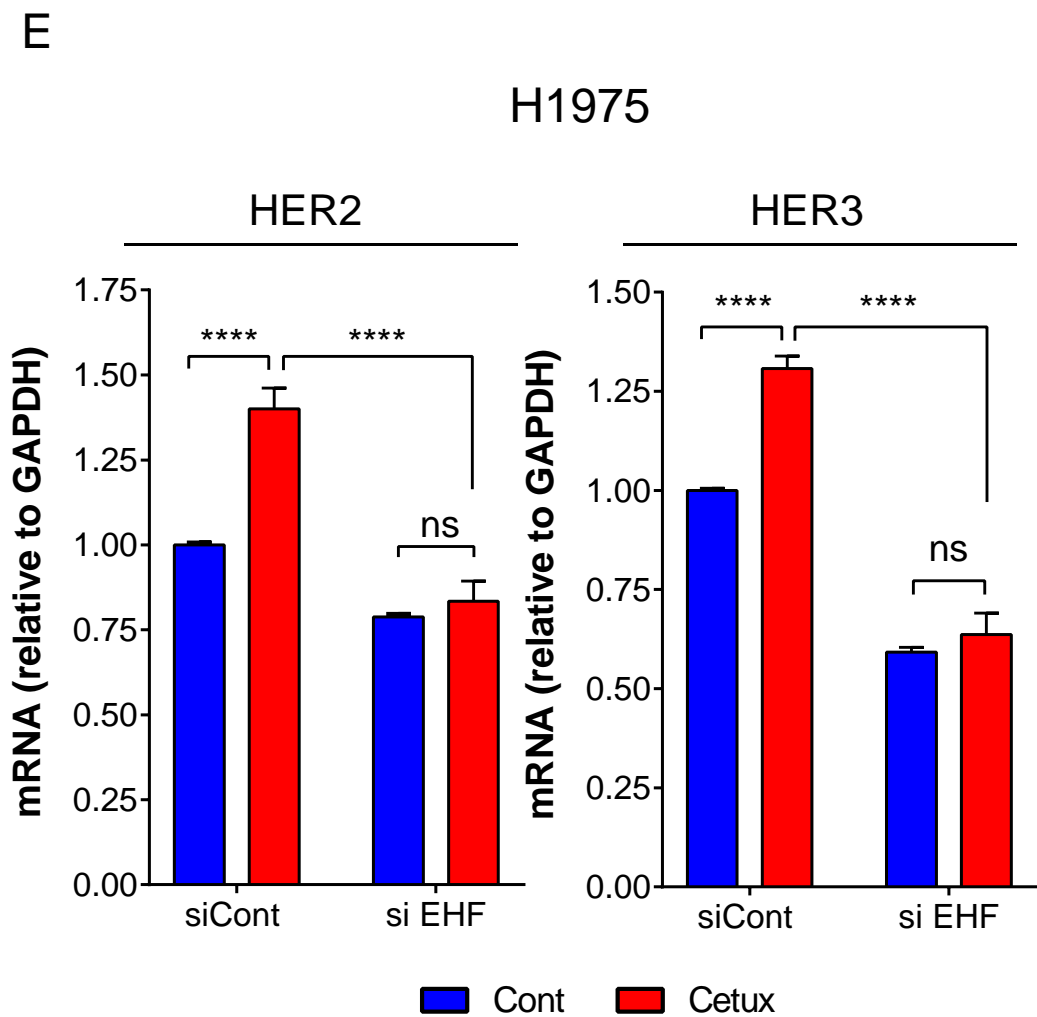

**Figure S6**

**Figure S1:**

Detailed summary of the history of the disease and treatment in the case report

**Figure S2:**

RNAseq gene expression analysis (**A**) and Locus analysis (**B**) of genes expressed differentially between the Cetux<sup>Res</sup> and the Cetux<sup>Sen</sup> tumors.

**Figure S3:**

(**A**) MET expression in the upper aerodigestive cell lines compared to other tumor cell lines extracted from the Cancer Cell Line Encyclopedia (CCLE), and MET expression level (RMA, log<sub>2</sub>) in the HNSCC cell lines used in this study  
(**B**) 5-day proliferation assay testing cetuximab (12.5ug/ml) efficacy in CAL33 and HSC2 and the FaDu HNSCC cell lines, with and without rHGF (50ng/ml) and the MET inhibitors PHA-665752 (1uM) or MGCD265 (1uM). Statistical significance was calculated using one-way ANOVA (\*p<0.05, \*\*p<0.01, \*\*\*p<0.001). (**C**) 5-day proliferation assay testing cetuximab (12.5ug/ml) efficacy in FaDu shCont and FaDu shMET with and without rHGF (50ng/ml), low panel - Western blot of MET (**D**) Western blot for the indicated protein levels following 24h treatment of cetuximab (12.5ug/ml), with different duration of rHGF (50ng/ml) stimulation (**E**) Protein expression (Protein Array -Pathscan) of the SNU1076 HNSCC cell line treated with cetuximab (12.5ug/ml) for 24 hours with and without rHGF (50ng/ml) and the MET inhibitor PHA-665752 (1uM). Results are presented according to the cetuximab inhibition level. (**F**) Western blot for the indicated protein levels following 24h treatment of cetuximab (12.5ug/ml), with and without rHGF (50ng/ml) and the MET inhibitor PHA-665752 (1uM), in the CAL33 HNSCC cell lines and densitometry of phosphorylated ERK normalized to total ERK. Statistical significance was calculated using an unpaired t-test with Welch's correction (\*p<0.05, \*\*p<0.01). (**G**) Densitometry of phosphorylated ERK normalized to total ERK  
Statistical significance was calculated using one way ANOVA test (\*p<0.05, \*\*p<0.01)

**Figure S4:**

(A) Excised tumors and the mice after 25-day treatments. (B) Tumor weight (mg) at the end point (day 25). Statistical significance was calculated using one-way ANOVA (\* $p < 0.05$ , \*\* $p < 0.01$ ).

**Figure S5:**

(A) Quantification of the Proteome Profiler™ Antibody Arrays (R&D systems) pixel density for the indicated phospho-RTK in the SNU1076 HNSCC cell line following 24h treatment of cetuximab (12.5ug/ml), with and without rHGF (50ng/ml). (B) Dotplot analysis of mRNA expression levels of MET and ERBB2/ERBB3 obtained from the TCGA dataset of HNSCC. (C) 5-day proliferation assay testing cetuximab (12.5ug/ml) efficacy in SNU1076 and HSC4 HNSCC cell lines, HER2/3 blockers afatinib (500 nM) and lapatinib (500 nM) with and without rHGF (50ng/ml) and the MET inhibitors PHA-665752 (1uM). Representative experiment of two, each experiment was performed in biological triplicate. (D) Western blot for the indicated protein levels following 24h treatment of cetuximab (12.5ug/ml), with and without rHGF (50ng/ml) and the MEK1/2 inhibitor PD-0325901 (25nM), in the HSC4 HNSCC cell line. (E) Western blot for the indicated protein levels following 24h treatment of cetuximab (12.5ug/ml), with and without rHGF (50ng/ml) and the MEK1/2 inhibitor PD-0325901 (25 nM), AKT inhibitor MK22016 (1 uM), and STAT3 inhibitor CAS 1041438-68-9 (25nM) in the SNU1076 HNSCC cell line

**Figure S6:**

(A) Correlation between mRNA expression level (log2) of HER2 or HER3 with EHF (top panels) or Foxo3 (bottom panels), in the HNSCC datasets of TCGA. Blue dots indicate that neither of the genes is mutated. (B) mRNA levels of HER2 and HER3 following 24h treatment of cetuximab (12.5ug/ml), with either siCT or siFOXO3 in SNU1076 HNSCC. (C) Western blot for the indicated protein levels following 24h treatment of cetuximab (12.5ug/ml), with either siCT, siEHF, or siFoxo3 in SNU1076 HNSCC. (D) Densitometry of ERBBs normalized to total actin. (E) mRNA levels of HER2 and HER3 following 24h treatment of cetuximab (12.5ug/ml), with either siCont or siEHF in H1975 lung cancer cell line.
